# Supplementary material for: A greener approach for impressive removal of As(iii)/As(v) from an ultra-low concentration using a highly efficient chitosan thiomer as a new adsorbent
Source: Royal Society of Chemistry journal article supplement (doi:10.1039/c6ra10595e), 2016-01-01
Supplement: c6ra10595e1.pdf [file c6ra10595e1.pdf]

**Greener approach for impressive removal of As(III)/As(V) from ultra-low concentration using highly efficient chitosan thiomers as a new adsorbent**

Prem Singh,<sup>1</sup> Kalpana Chauhan,<sup>1\*</sup> Vishal Priya<sup>1</sup> and Rakesh Kumar Singhal<sup>2</sup>

<sup>1</sup>School of Chemistry, Shoolini University, Solan 173229, India

<sup>2</sup>Analytical Chemistry Division, Bhabha Atomic Research Center, Mumbai-4000085, India

\*email: [kalpana13chauhan@gmail.com](mailto:kalpana13chauhan@gmail.com)

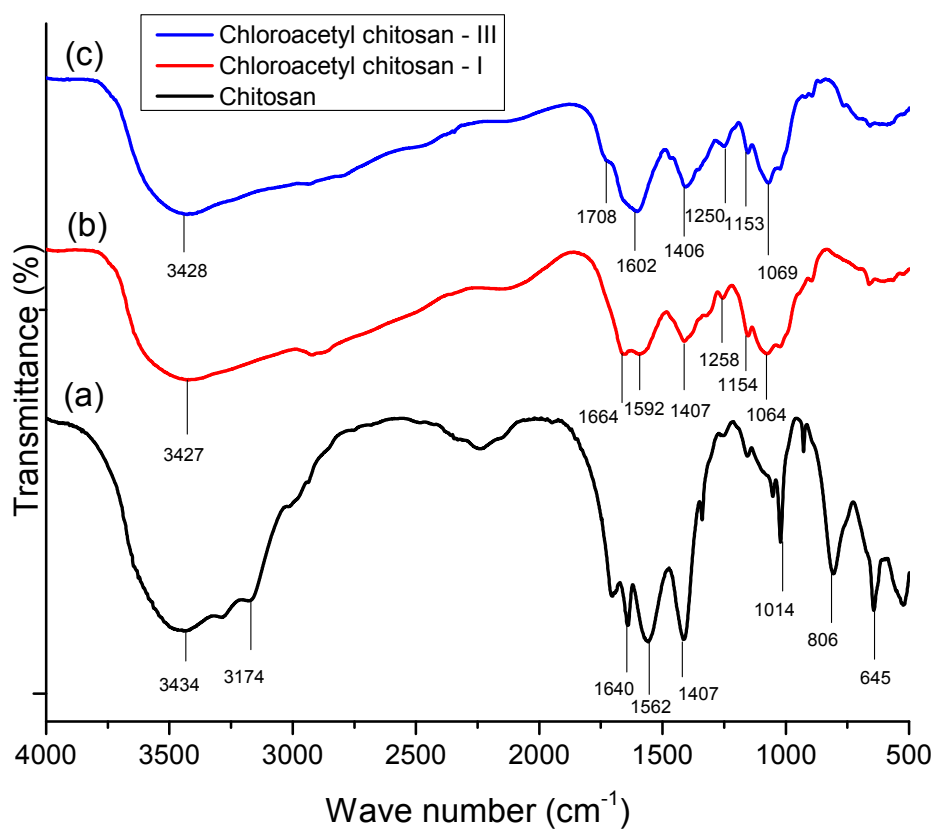

**Fig. S1** FTIR spectra for (a) chitosan (b) chloroacetyl chitosan-I and (c) chloroacetyl chitosan-III

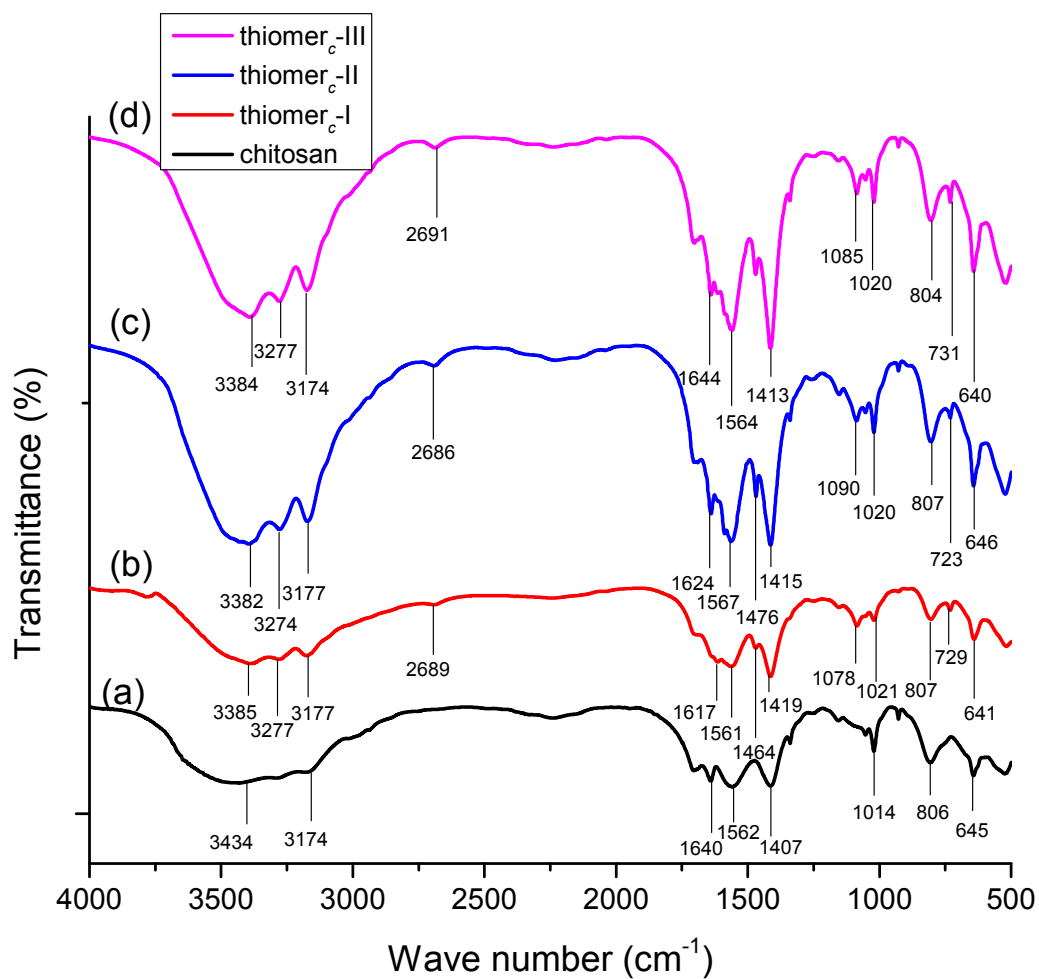

**Fig. S2** FTIR spectra for (a) chitosan (b) thiomerc-I (c) thiomerc-II and (d) thiomerc-III

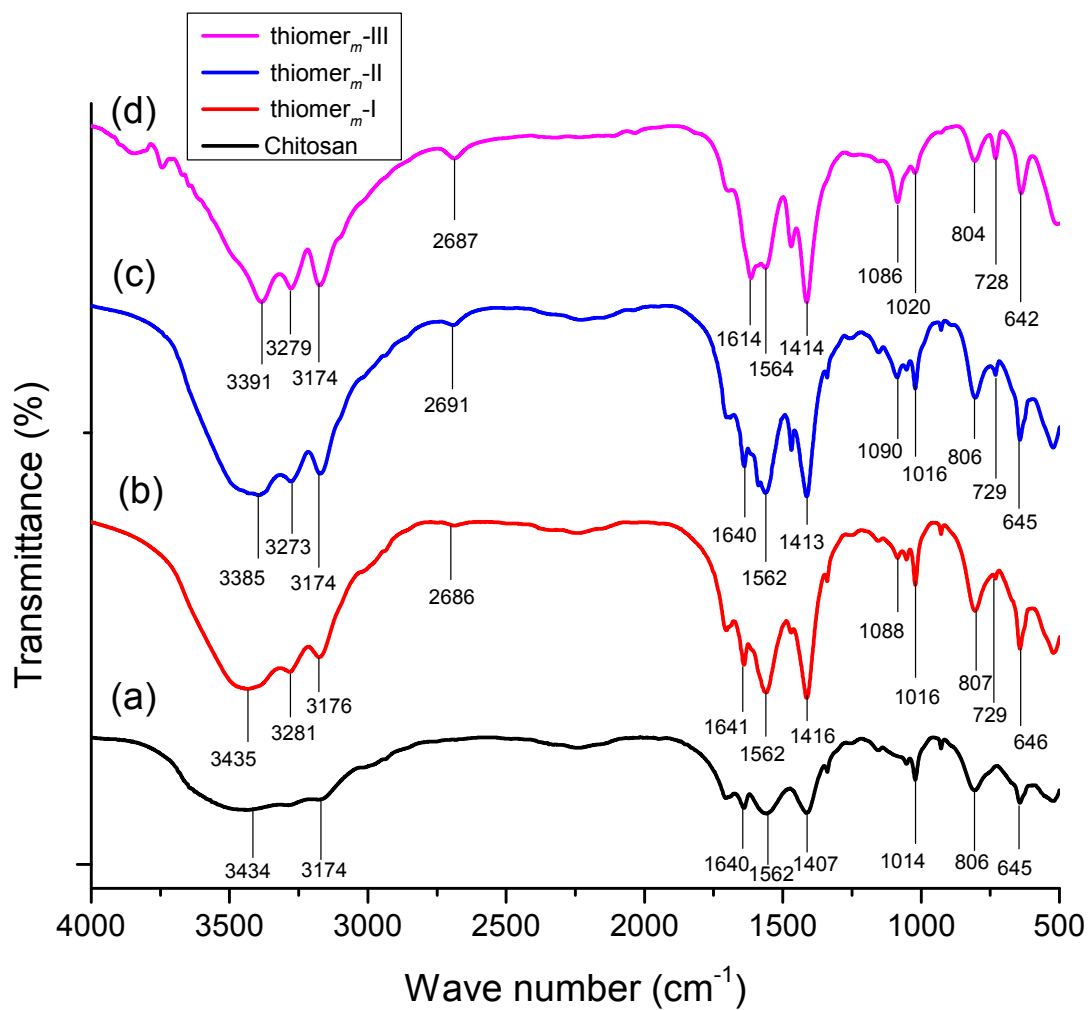

**Fig. S3** FTIR spectra for (a) chitosan (b) thiomers<sub>m</sub>-I (c) thiomers<sub>m</sub>-II and (d) thiomers<sub>m</sub>-III

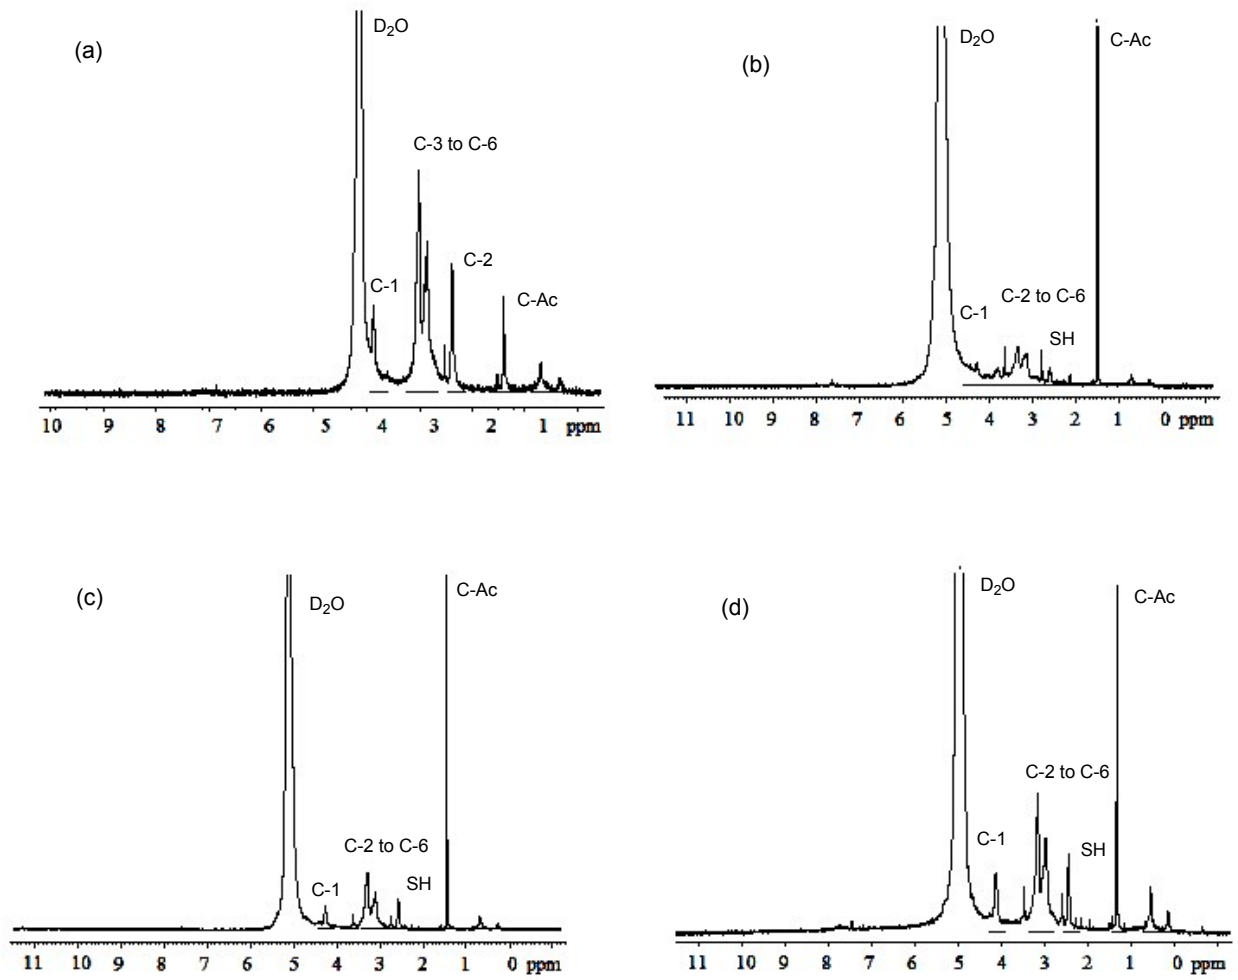

**Fig. S4** NMR spectra for (a) chitosan (b) thiomerc<sub>c</sub>-I (c) thiomerc<sub>c</sub>-II (d) thiomerc<sub>c</sub>-III

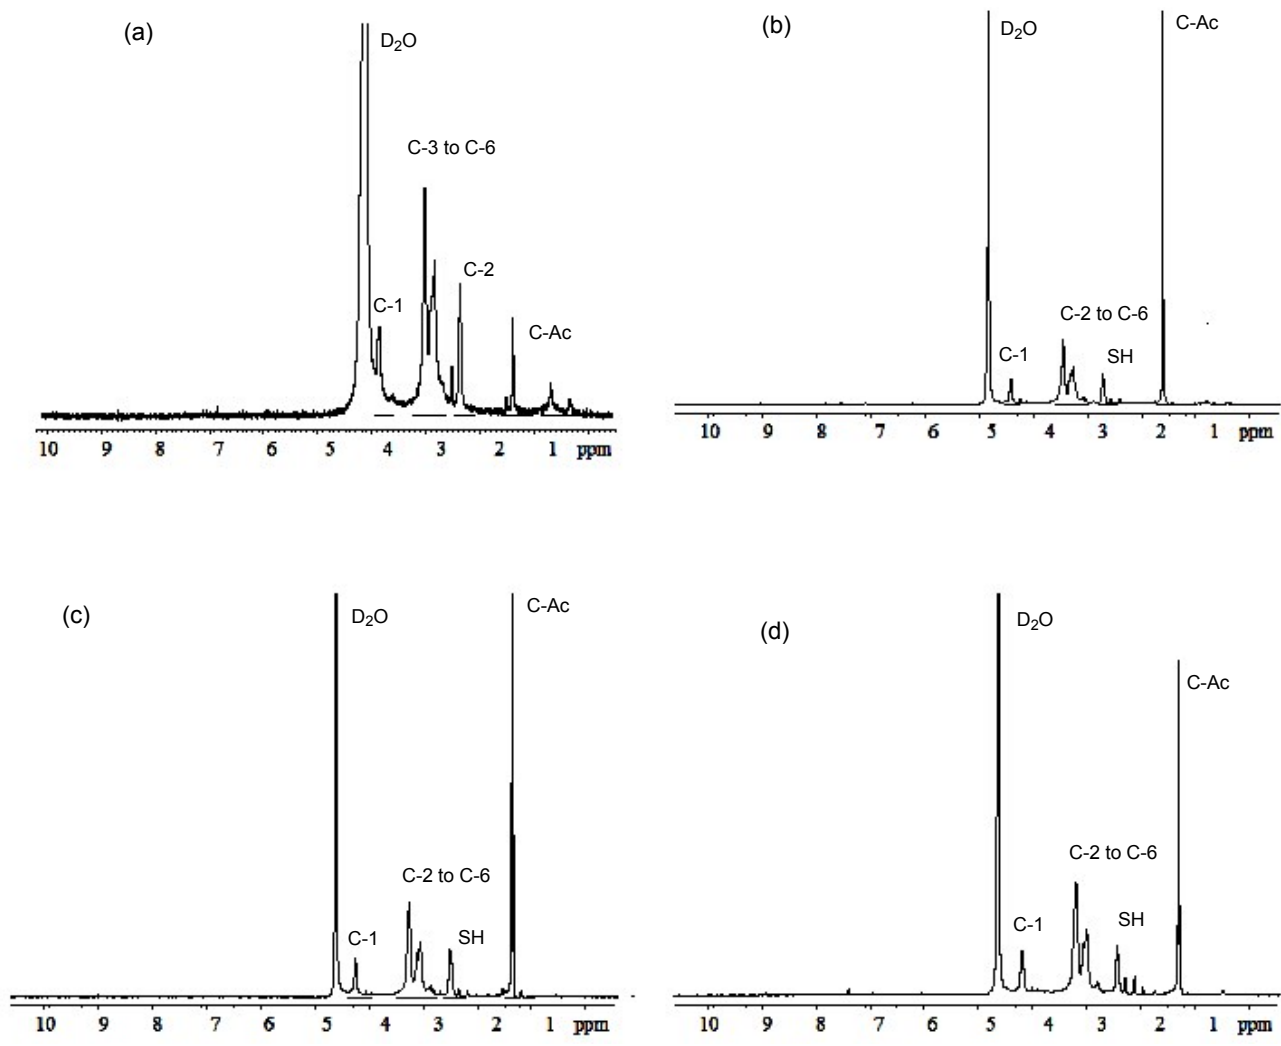

**Fig. S5** NMR spectra for (a) chitosan (b) thiomerm-I (c) thiomerm-II (d) thiomerm-III
